# Supplementary material for: Validation of the Toronto hepatocellular carcinoma risk index for patients with cirrhosis in China: a retrospective cohort study
Source: World J Surg Oncol. 2019 Apr 30;17:75. doi: 10.1186/s12957-019-1619-3 (PMC6492382; doi:10.1186/s12957-019-1619-3)
Supplement: Supplementary file 1 — Characteristics of 76 patients with HCC. (XLSX 11 kb) [file 12957_2019_1619_MOESM1_ESM.xlsx]

## Sheet: Sheet1
Additional file 1. Characteristics of 76 patients with HCC
ID	Follow-up	BCLC Stage	Symptom	Treatment
1018270	Ultrasound	D	Abdominal Distention + Atypical Manifestations (fatigue, anorexia, etc.)	Conservative Treatment
1130553	Ultrasound+AFP	C	Abdominal Distention + Atypical Manifestations (fatigue, anorexia, etc.)	Conservative Treatment
937492	Ultrasound+AFP	D	Atypical Manifestations (fatigue, anorexia, etc.)	Conservative Treatment
1112539	CT+AFP	D	Atypical Manifestations (fatigue, anorexia, etc.)	Conservative Treatment
952496	CT	C	Atypical Manifestations (fatigue, anorexia, etc.)	Conservative Treatment
1037580	CT	C	Atypical Manifestations (fatigue, anorexia, etc.)	Conservative Treatment
1210546	CT	C	Abdominal Distention	Conservative Treatment
926372	CT+AFP	B	None	TAE
896394	Ultrasound+AFP	D	None	Conservative Treatment
917779	Ultrasound+AFP	D	None	Conservative Treatment
1284447	CT+AFP	B	None	TACE
1046356	CT+AFP	C	Abdominal Pain	Conservative Treatment
1268284	MRI	A4	None	TAE
1014907	CT+AFP	C	Abdominal Distention + Atypical Manifestations (fatigue, anorexia, etc.)	Conservative Treatment
905321	Ultrasound+CT	C	Abdominal Pain and Distention	Chemotherapy
1136645	MRI	C	Atypical Manifestations (fatigue, anorexia, etc.)	RF+TAE
962761	Ultrasound	C	Abdominal Distention	TACE
1029001	CT	A4	None	Surgery
917772	Ultrasound+AFP	C	None	RF+TACE
919394	Ultrasound	D	Abdominal Distention + Atypical Manifestations (fatigue, anorexia, etc.)	Conservative Treatment
1285476	CT	B	Abdominal Distention + Atypical Manifestations (fatigue, anorexia, etc.)	Surgery
1316788	CT+AFP	C	Abdominal Pain + Atypical Manifestations (fatigue, anorexia, etc.)	Conservative Treatment
1159187	MRI	B	Abdominal Pain + Atypical Manifestations (fatigue, anorexia, etc.)	Surgery
1199138	CT+AFP	D	Abdominal Pain and Distention	Conservative Treatment
1224981	CT+AFP	D	Abdominal Pain and Distention	Conservative Treatment
6012988	Ultrasound	C	Abdominal Pain and Distention	TACE
1175267	Ultrasound	D	Atypical Manifestations (fatigue, anorexia, etc.)	Conservative Treatment
1141517	Ultrasound	B	Atypical Manifestations (fatigue, anorexia, etc.)	Surgery
1133252	CT	B	Atypical Manifestations (fatigue, anorexia, etc.)	TACE
1182277	CT	D	Atypical Manifestations (fatigue, anorexia, etc.)	Conservative Treatment
1181372	Ultrasound+CT+AFP	A1	Abdominal Distention	Surgery
1203006	CT+AFP	B	Abdominal Distention	TACE
1143358	Ultrasound+AFP	D	Abdominal Distention	Conservative Treatment
1193024	Ultrasound+AFP	B	Abdominal Distention	Surgery
1231136	Ultrasound+AFP	B	Abdominal Distention	Conservative Treatment
6062605	CT	B	Abdominal Pain	Surgery + TACE
1146517	Ultrasound+AFP	B	Abdominal Pain	TACE
1116024	Ultrasound+CT	D	Abdominal Pain	Conservative Treatment
1139056	CT+AFP	C	Abdominal Pain	TACE
1148777	CT	C	Abdominal Pain	Conservative Treatment
1033741	Ultrasound+AFP	B	Abdominal Pain	TACE
1000651	Ultrasound+AFP	C	Abdominal Pain	TACE
1085103	Ultrasound	C	Abdominal Pain	Conservative Treatment
1138761	CT	B	None	Surgery
1001812	CT+AFP	B	None	TACE
922965	CT+AFP	B	None	Conservative Treatment
1177266	CT	B	None	Surgery
1215352	CT	A3	None	Surgery
1066505	MRI	C	None	Conservative Treatment
1198375	CT	A4	None	Gamma Knife + TAE
1217805	CT	B	None	TACE
1182280	CT+AFP	A3	None	RF
1203027	CT+AFP	A2	None	TACE
1109857	CT+AFP	C	None	Conservative Treatment
1210028	Ultrasound+AFP	B	None	Surgery
1079770	Ultrasound	A1	None	Surgery
1165799	CT+AFP	C	None	Conservative Treatment
1305855	Ultrasound+AFP	B	None	Surgery
1243557	Ultrasound	B	None	Surgery + TACE + RF
916659	CT	B	None	Liver Transplatation
6009079	Ultrasound+AFP	A4	None	RF+TACE
1221192	CT+AFP	C	None	Conservative Treatment
1165751	CT+AFP	B	None	Conservative Treatment
1259930	CT	B	None	RF
1129752	Ultrasound	B	None	TACE
1135234	CT	B	None	TACE
1180204	Ultrasound+CT+AFP	B	None	RF+TACE
1134960	Ultrasound+AFP	B	None	Chemotherapy
926124	Ultrasound+AFP	D	Abdominal Distention + Atypical Manifestations (fatigue, anorexia, etc.)	Conservative Treatment
1223916	CT+AFP	C	Abdominal Pain	Conservative Treatment
956268	Ultrasound+CT	B	Abdominal Pain	Conservative Treatment
6000674	CT	B	Abdominal Pain	Surgery
1035031	CT+AFP	B	None	Radiation Therapy （Gamma Knife）
910616	Ultrasound+AFP	B	None	Surgery
1090471	CT+AFP	B	None	Conservative Treatment
1215284	Ultrasound+AFP	B	None	Radiation Therapy （Radioactive Seed Implantation）
				Transarterial chemoembolization, TACE
				Transarterial embolization, TAE
				Radiofrequency ablation, RFA
