# Supplementary material for: Validation of the Toronto hepatocellular carcinoma risk index for patients with cirrhosis in China: a retrospective cohort study
Source: World J Surg Oncol. 2019 Apr 30;17:75. doi: 10.1186/s12957-019-1619-3 (PMC6492382; doi:10.1186/s12957-019-1619-3)
Supplement: Supplementary file 2 — Categories of etiology in three risk groups. (XLSX 9 kb) [file 12957_2019_1619_MOESM2_ESM.xlsx]

## Sheet: Sheet1
Additional file 2. Categories of etiology in three risk groups
	HBV (n=184)	HCV (n=8)	ALD (n=30)	NAFLD (n=1)	AIH (n=33)	PBC (n=23)	PSC (n=1)	OTHER (n=240)
Low-risk (n=23)					8	4	1	10
Intermediate-risk (n=248)	38	3	9	1	25	18		154
High-risk (n=249)	146	5	21			1		76
